# Supplementary material for: Treatment related toxicities with combination BRAF and MEK inhibitor therapy in resected stage III melanoma
Source: PubMed Central journal article supplement (PMC9538392; doi:10.3389/fonc.2022.855794), 2022-09-23
Supplement: Table_1.pdf [file Table_1.pdf]

## Supplementary Appendix 1. Patient Characteristics

| Characteristic                     | Number of patients (%) |
|------------------------------------|------------------------|
| Median age, years (range)          | 44.9 (21-73)           |
| Sex                                |                        |
| Male                               | 11 (55%)               |
| Female                             | 9 (45%)                |
| ECOG Performance Status            |                        |
| 0                                  | 18 (90%)               |
| 1                                  | 2 (10%)                |
| ≥2                                 | 0                      |
| Stage (AJCC 8th Edition)           |                        |
| IIIA                               | 2 (10%)                |
| IIIB                               | 5 (25%)                |
| IIIC                               | 12 (60%)               |
| IIID                               | 1 (5%)                 |
| BRAF                               |                        |
| V600E                              | 18 (90%)               |
| V600K                              | 2 (10%)                |
| Positive Lymph Nodes               |                        |
| 1                                  | 9 (45%)                |
| 2 or 3                             | 7 (35%)                |
| 4+                                 | 4 (20%)                |
| Primary Tumor Ulceration           | 6 (30%)                |
| Satellite or In-Transit Metastases | 5 (25%)                |
| Complete Lymph Node Dissection     | 12 (60%)               |
| Prior Adjuvant Systemic Therapy    | 1 (5%) <sup>a</sup>    |
| Radiation Therapy                  | 2 (10%)                |

|                                  |                      |
|----------------------------------|----------------------|
| Underlying Liver Disease         | 2 (10%) <sup>b</sup> |
| Baseline Acetaminophen Use       | 13 (65%)             |
| Baseline Statin Therapy          | 2 (10%)              |
| Alcohol Use                      |                      |
| Yes - Less than 2 drinks per day | 12 (60%)             |
| Yes - 2 or more drinks per day   | 2 (10%)              |
| No                               | 5 (25%)              |
| Not reported                     | 1 (5%)               |

<sup>a</sup>Received adjuvant interferon with prior melanoma occurrence

<sup>b</sup>Hepatic steatosis
